# Supplementary material for: The Dental Aesthetic Index and Its Association with Dental Caries, Dental Plaque and Socio-Demographic Variables in Schoolchildren Aged 12 and 15 Years
Source: MDPI journal article supplement (doi:10.3390/ijerph18189741), 2021-09-16
Supplement: s1 [file s1]

## Supplementary Material

### The Dental Aesthetic Index and its Association with Dental Caries, Dental Plaque and Socio-Demographic Variables in Schoolchildren Aged 12 and 15 Years

Paula Fernández-Riveiro, Nerea Obregón-Rodríguez, María Piñeiro-Lamas, Almudena Rodríguez-Fernández, Ernesto Smyth-Chamosa and María Mercedes Suárez-Cunqueiro

**Table S1.** Differences between age groups: Chi-square test *p*-values.

| Variables         | Null   | Moderate | Severe/Very Severe |
|-------------------|--------|----------|--------------------|
| Sex               | 0.572  | 0.111    | 0.009              |
| Social class      | <0.001 | 0.001    | 0.007              |
| Residence         | 0.186  | 0.001    | 0.055              |
| Type of school    | 0.003  | <0.001   | <0.001             |
| Caries experience | <0.001 | <0.001   | 0.302              |
| Dental plaque     | <0.001 | <0.001   | <0.001             |

**Table S2.** Intraclass Correlation Coefficient index (ICC) between each of the five work teams and the external calibrator.

| Work Teams                               | ICC (IC95%)          | <i>p</i> -Value |
|------------------------------------------|----------------------|-----------------|
| <b>Work Team 1</b>                       |                      |                 |
| Number of missing upper teeth            | 1 (1–1) <sup>a</sup> | -               |
| Number of missing lower teeth            | 1 (1–1) <sup>a</sup> | -               |
| Crowding (incisal segments)              | 1 (1–1) <sup>a</sup> | -               |
| Spacing in the incisal segments          | 1 (1–1) <sup>a</sup> | -               |
| Midline diastema                         | 0.97 (0.95–0.98)     | <0.001          |
| Largest anterior maxillary irregularity  | 0.99 (0.98–0.99)     | <0.001          |
| Largest anterior mandibular irregularity | 1 (1–1) <sup>a</sup> | -               |
| Anterior maxillary overjet               | 1 (1–1) <sup>a</sup> | -               |
| Anterior mandibular overjet              | 1 (1–1) <sup>a</sup> | -               |
| Vertical anterior open bite              | 1 (1–1) <sup>a</sup> | -               |
| Anteroposterior molar relationship       | 1 (1–1) <sup>a</sup> | -               |
| Dental Aesthetic Index (DAI) Score       | 0.99 (0.98–1)        | <0.001          |
| <b>Work Team 2</b>                       |                      |                 |
| Number of missing upper teeth            | 1 (1–1) <sup>a</sup> | -               |
| Number of missing lower teeth            | 1 (1–1) <sup>a</sup> | -               |
| Crowding (incisal segments)              | 0.90 (0.83–0.95)     | <0.001          |
| Spacing in the incisal segments          | 1 (1–1) <sup>a</sup> | -               |
| Midline diastema                         | 1 (1–1) <sup>a</sup> | -               |
| Largest anterior maxillary irregularity  | 0.99 (0.98–0.99)     | <0.001          |
| Largest anterior mandibular irregularity | 0.98 (0.94–0.98)     | <0.001          |
| Anterior maxillary overjet               | 0.99 (0.99–1)        | <0.001          |
| Anterior mandibular overjet              | 1 (1–1) <sup>a</sup> | -               |
| Vertical anterior open bite              | 1 (1–1) <sup>a</sup> | -               |
| Anteroposterior molar relationship       | 1 (1–1) <sup>a</sup> | -               |

|                                          |                      |        |
|------------------------------------------|----------------------|--------|
| DAI Score                                | 0.99 (0.99–1)        | <0.001 |
| <b>Work Team 3</b>                       |                      |        |
| Number of missing upper teeth            | 1 (1–1) <sup>a</sup> | -      |
| Number of missing lower teeth            | 0.80 (0.64–0.88)     | <0.001 |
| Crowding (incisal segments)              | 1 (1–1) <sup>a</sup> | -      |
| Spacing in the incisal segments          | 0.88 (0.79–0.93)     | <0.001 |
| Midline diastema                         | 0.96 (0.94–0.98)     | <0.001 |
| Largest anterior maxillary irregularity  | 0.97 (0.95–0.98)     | <0.001 |
| Largest anterior mandibular irregularity | 0.98 (0.94–0.98)     | <0.001 |
| Anterior maxillary overjet               | 0.98 (0.97–0.99)     | <0.001 |
| Anterior mandibular overjet              | 1 (1–1) <sup>a</sup> | -      |
| Vertical anterior open bite              | 1 (1–1) <sup>a</sup> | -      |
| Anteroposterior molar relationship       | 0.93 (0.88–0.96)     | <0.001 |
| DAI Score                                | 0.94 (0.90–0.97)     | <0.001 |
| <b>Work Team 4</b>                       |                      |        |
| Number of missing upper teeth            | 1 (1–1) <sup>a</sup> | -      |
| Number of missing lower teeth            | 1 (1–1) <sup>a</sup> | -      |
| Crowding (incisal segments)              | 1 (1–1) <sup>a</sup> | -      |
| Spacing in the incisal segments          | 1 (1–1) <sup>a</sup> | -      |
| Midline diastema                         | 1 (1–1) <sup>a</sup> | -      |
| Largest anterior maxillary irregularity  | 0.99 (0.98–0.99)     | <0.001 |
| Largest anterior mandibular irregularity | 0.97 (0.94–0.98)     | <0.001 |
| Anterior maxillary overjet               | 1 (1–1) <sup>a</sup> | -      |
| Anterior mandibular overjet              | 1 (1–1) <sup>a</sup> | -      |
| Vertical anterior open bite              | 1 (1–1) <sup>a</sup> | -      |
| Anteroposterior molar relationship       | 0.93 (0.88–0.96)     | <0.001 |
| DAI Score                                | 0.99 (0.98–0.99)     | <0.001 |
| <b>Work Team 5</b>                       |                      |        |
| Number of missing upper teeth            | 1 (1–1) <sup>a</sup> | -      |
| Number of missing lower teeth            | 1 (1–1) <sup>a</sup> | -      |
| Crowding (incisal segments)              | 1 (1–1) <sup>a</sup> | -      |
| Spacing in the incisal segments          | 1 (1–1) <sup>a</sup> | -      |
| Midline diastema                         | 0.96 (0.94–0.98)     | <0.001 |
| Largest anterior maxillary irregularity  | 0.98 (0.96–0.99)     | <0.001 |
| Largest anterior mandibular irregularity | 0.95 (0.91–0.97)     | <0.001 |
| Anterior maxillary overjet               | 1 (1–1) <sup>a</sup> | -      |
| Anterior mandibular overjet              | 1 (1–1) <sup>a</sup> | -      |
| Vertical anterior open bite              | 1 (1–1) <sup>a</sup> | -      |
| Anteroposterior molar relationship       | 0.88 (0.78–0.93)     | <0.001 |
| DAI Score                                | 0.98 (0.96–0.99)     | <0.001 |

<sup>a</sup> 100% agreement.

**Table S3.** Cohen's Kappa concordance index between each of the five work teams and the external calibrator.

| Work Teams                                 | Weighted Kappa          |                 |
|--------------------------------------------|-------------------------|-----------------|
|                                            | K <sub>w</sub> (95% CI) | <i>p</i> -Value |
| <b>Work Team 1</b>                         |                         |                 |
| Malocclusion: four categories <sup>a</sup> | 1 (1–1) <sup>b</sup>    | -               |
| Malocclusion: yes/no                       | 1 (1–1) <sup>b</sup>    | -               |
| <b>Work Team 2</b>                         |                         |                 |
| Malocclusion: four categories <sup>a</sup> | 1 (1–1) <sup>b</sup>    | -               |
| Malocclusion: yes/no                       | 1 (1–1) <sup>b</sup>    | -               |
| <b>Work Team 3</b>                         |                         |                 |
| Malocclusion: four categories <sup>a</sup> | 0.84 (0.81–0.87)        | <0.001          |
| Malocclusion: yes/no                       | 0.78 (0.74–0.82)        | <0.001          |
| <b>Work Team 4</b>                         |                         |                 |
| Malocclusion: four categories <sup>a</sup> | 1 (1–1) <sup>b</sup>    | -               |
| Malocclusion: yes/no                       | 1 (1–1) <sup>b</sup>    | -               |
| <b>Work Team 5</b>                         |                         |                 |
| Malocclusion: four categories <sup>a</sup> | 0.94 (0.93–0.96)        | <0.001          |
| Malocclusion: yes/no                       | 0.92 (0.90–0.95)        | <0.001          |

<sup>a</sup> No malocclusion, moderate, severe or very severe malocclusion.

<sup>b</sup> 100% agreement.

**Table S4.** Intraclass Correlation Coefficient index (ICC) between each of the five work teams.

| Work Teams                               | ICC (95% CI)         | <i>p</i> -Value |
|------------------------------------------|----------------------|-----------------|
| <b>Work Team 1</b>                       |                      |                 |
| Number of missing upper teeth            | 1 (1–1) <sup>a</sup> | -               |
| Number of missing lower teeth            | 1 (1–1) <sup>a</sup> | -               |
| Crowding (incisal segments)              | 0.96 (0.93–0.98)     | <0.001          |
| Spacing in the incisal segments          | 0.93 (0.88–0.96)     | <0.001          |
| Midline diastema                         | 0.95 (0.91–0.97)     | <0.001          |
| Largest anterior maxillary irregularity  | 0.98 (0.96–0.99)     | <0.001          |
| Largest anterior mandibular irregularity | 0.80 (0.64–0.89)     | <0.001          |
| Anterior maxillary overjet               | 0.93 (0.88–0.96)     | <0.001          |
| Anterior mandibular overjet              | 0.93 (0.88–0.96)     | <0.001          |
| Vertical anterior open bite              | 1 (1–1) <sup>a</sup> | -               |
| Anteroposterior molar relationship       | 0.81 (0.66–0.89)     | <0.001          |
| DAI Score                                | 0.93 (0.88–0.96)     | <0.001          |
| <b>Work Team 2</b>                       |                      |                 |
| Number of missing upper teeth            | 1 (1–1) <sup>a</sup> | -               |
| Number of missing lower teeth            | 1 (1–1) <sup>a</sup> | -               |
| Crowding (incisal segments)              | 0.84 (0.71–0.91)     | <0.001          |
| Spacing in the incisal segments          | 0.88 (0.79–0.93)     | <0.001          |
| Midline diastema                         | 0.91 (0.85–0.95)     | <0.001          |
| Largest anterior maxillary irregularity  | 0.97 (0.94–0.98)     | <0.001          |
| Largest anterior mandibular irregularity | 0.96 (0.93–0.98)     | <0.001          |
| Anterior maxillary overjet               | 0.93 (0.87–0.96)     | <0.001          |
| Anterior mandibular overjet              | 1 (1–1) <sup>a</sup> | -               |

|                                          |                      |        |
|------------------------------------------|----------------------|--------|
| Vertical anterior open bite              | 1 (1–1) <sup>a</sup> | -      |
| Anteroposterior molar relationship       | 0.84 (0.72–0.91)     | <0.001 |
| DAI Score                                | 0.93 (0.88–0.96)     | <0.001 |
| <b>Work Team 3</b>                       |                      |        |
| Number of missing upper teeth            | 1 (1–1) <sup>a</sup> | -      |
| Number of missing lower teeth            | 1 (1–1) <sup>a</sup> | -      |
| Crowding (incisal segments)              | 0.79 (0.62–0.88)     | <0.001 |
| Spacing in the incisal segments          | 0.96 (0.92–0.98)     | <0.001 |
| Midline diastema                         | 0.54 (0.18–0.74)     | 0.014  |
| Largest anterior maxillary irregularity  | 0.93 (0.87–0.96)     | <0.001 |
| Largest anterior mandibular irregularity | 0.95 (0.90–0.97)     | <0.001 |
| Anterior maxillary overjet               | 0.84 (0.72–0.91)     | <0.001 |
| Anterior mandibular overjet              | 1 (1–1) <sup>a</sup> | -      |
| Vertical anterior open bite              | 1 (1–1) <sup>a</sup> | -      |
| Anteroposterior molar relationship       | 0.75 (0.56–0.86)     | <0.001 |
| DAI Score                                | 0.93 (0.88–0.96)     | <0.001 |
| <b>Work Team 4</b>                       |                      |        |
| Number of missing upper teeth            | 1 (1–1) <sup>a</sup> | -      |
| Number of missing lower teeth            | 1 (1–1) <sup>a</sup> | -      |
| Crowding (incisal segments)              | 0.80 (0.64–0.89)     | <0.001 |
| Spacing in the incisal segments          | 0.94 (0.89–0.97)     | <0.001 |
| Midline diastema                         | 0.75 (0.58–0.84)     | <0.001 |
| Largest anterior maxillary irregularity  | 0.94 (0.89–0.96)     | <0.001 |
| Largest anterior mandibular irregularity | 0.96 (0.93–0.98)     | <0.001 |
| Anterior maxillary overjet               | 0.89 (0.81–0.94)     | <0.001 |
| Anterior mandibular overjet              | 1 (1–1) <sup>a</sup> | -      |
| Vertical anterior open bite              | 1 (1–1) <sup>a</sup> | -      |
| Anteroposterior molar relationship       | 0.88 (0.80–0.94)     | <0.001 |
| DAI Score                                | 0.91 (0.85–0.95)     | <0.001 |
| <b>Work Team 5</b>                       |                      |        |
| Number of missing upper teeth            | 1 (1–1) <sup>a</sup> | -      |
| Number of missing lower teeth            | 1 (1–1) <sup>a</sup> | -      |
| Crowding (incisal segments)              | 0.94 (0.90–0.97)     | <0.001 |
| Spacing in the incisal segments          | 0.80 (0.64–0.88)     | <0.001 |
| Midline diastema                         | 0.76 (0.60–0.85)     | <0.001 |
| Largest anterior maxillary irregularity  | 0.96 (0.93–0.98)     | <0.001 |
| Largest anterior mandibular irregularity | 0.95 (0.90–0.97)     | <0.001 |
| Anterior maxillary overjet               | 0.94 (0.89–0.96)     | <0.001 |
| Anterior mandibular overjet              | 1 (1–1) <sup>a</sup> | -      |
| Vertical anterior open bite              | 0.88 (0.79–0.93)     | <0.001 |
| Anteroposterior molar relationship       | 0.94 (0.90–0.97)     | <0.001 |
| DAI Score                                | 0.96 (0.92–0.98)     | <0.001 |

<sup>a</sup> 100% agreement.

**Table S5.** Cohen's Kappa concordance index between each of the five work teams.

| Work Teams                                 | Weighted Kappa          |                 |
|--------------------------------------------|-------------------------|-----------------|
|                                            | K <sub>w</sub> (95% CI) | <i>p</i> -Value |
| <b>Work Team 1</b>                         |                         |                 |
| Malocclusion: four categories <sup>a</sup> | 0.84 (0.81–0.87)        | <0.001          |
| Malocclusion: yes/no                       | 0.82 (0.78–0.86)        | <0.001          |
| <b>Work Team 2</b>                         |                         |                 |
| Malocclusion: four categories <sup>a</sup> | 0.84 (0.80–0.89)        | <0.001          |
| Malocclusion: yes/no                       | 0.72 (0.66–0.78)        | <0.001          |
| <b>Work Team 3</b>                         |                         |                 |
| Malocclusion: four categories <sup>a</sup> | 0.73 (0.67–0.79)        | <0.001          |
| Malocclusion: yes/no                       | 0.79 (0.72–0.85)        | <0.001          |
| <b>Work Team 4</b>                         |                         |                 |
| Malocclusion: four categories <sup>a</sup> | 0.65 (0.55–0.76)        | <0.001          |
| Malocclusion: yes/no                       | 0.65 (0.55–0.76)        | <0.001          |
| <b>Work Team 5</b>                         |                         |                 |
| Malocclusion: four categories <sup>a</sup> | 0.85                    | <0.001          |
| Malocclusion: yes/no                       | 1 (1–1) <sup>a</sup>    | -               |

<sup>a</sup> No malocclusion, moderate, severe, or very severe malocclusion.
